# Supplementary material for: A Cortical Substrate for Square-Wave Jerks in Progressive Supranuclear Palsy
Source: PubMed Central journal article supplement — J Clin Neurol. 2019 Dec 30;16(1):37–45. doi: 10.3988/jcn.2020.16.1.37 (PMC6974821; doi:10.3988/jcn.2020.16.1.37), 2019-12-30
Supplement: jcn-16-37-s001.pdf [file jcn-16-37-s001.pdf]

**Supplementary Table 1.** Clinical and demographic characteristics

|                         | <b>PSP</b> | <b>PD</b> | <b>Controls</b> |
|-------------------------|------------|-----------|-----------------|
| Number of participants  | 12         | 12        | 12              |
| Age, years              | 65.7±5.8   | 68.7±10.1 | 67.7±7.9        |
| Disease duration, years | 3.8±1.8    | 6.7±5.8   | n.a.            |
| Clinical scale score*   | 42.7±16.4  | 20.0±19.6 | n.a.            |
| MMSE score              | 25.5±2.1   | 28.0±2.4  | 28.5±1.7        |

Data are mean±SD values.

\*The Progressive Supranuclear Palsy Rating Scale was used for PSP patients, and the motor score of the Unified Parkinson Disease Rating Scale in the on condition was used for PD patients.

MMSE: Mini Mental State Examination, n.a.: not applicable, PD: Parkinson's disease, PSP: progressive supranuclear palsy.
